# Supplementary material for: Promiscuous enzymatic activity-aided multiple-pathway network design for metabolic flux rearrangement in hydroxytyrosol biosynthesis
Source: PubMed Central journal article supplement (PMC6393456; doi:10.1038/s41467-019-08781-2), 2019-02-27
Supplement: 41467_2019_8781_MOESM1_ESM.pdf [file 41467_2019_8781_MOESM1_ESM.pdf]

**Promiscuous enzymatic activity-aided multiple-pathway network design for  
metabolic flux rearrangement in hydroxytyrosol biosynthesis**

Chen *et al.*

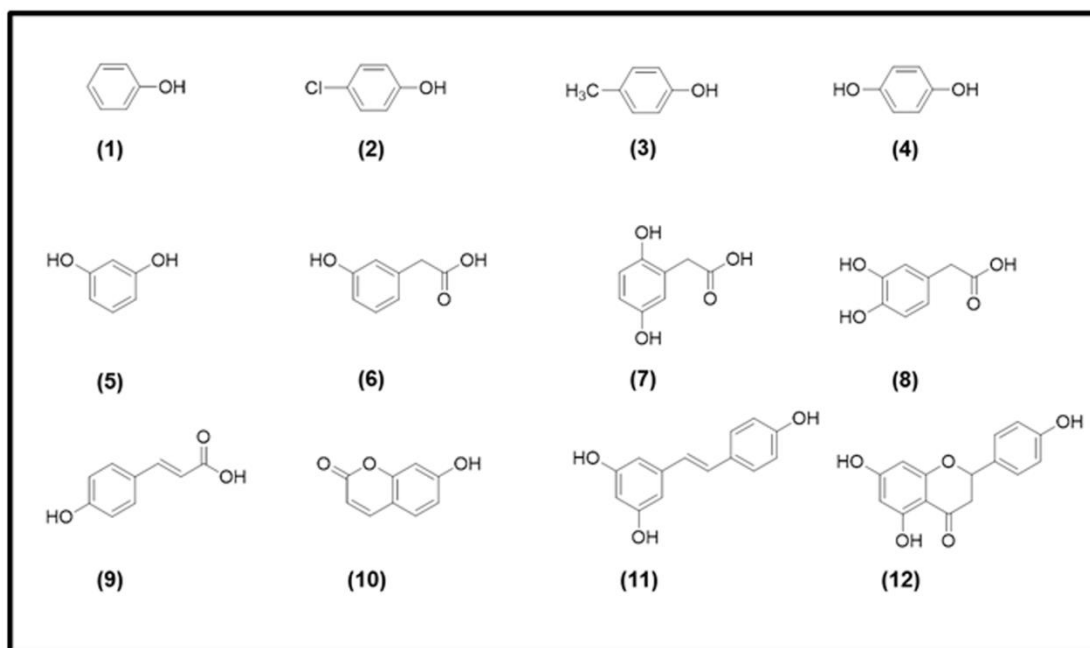

**Supplementary Figure. 1.** Reported substrates of wild-type HpaBC<sup>1-2</sup>.

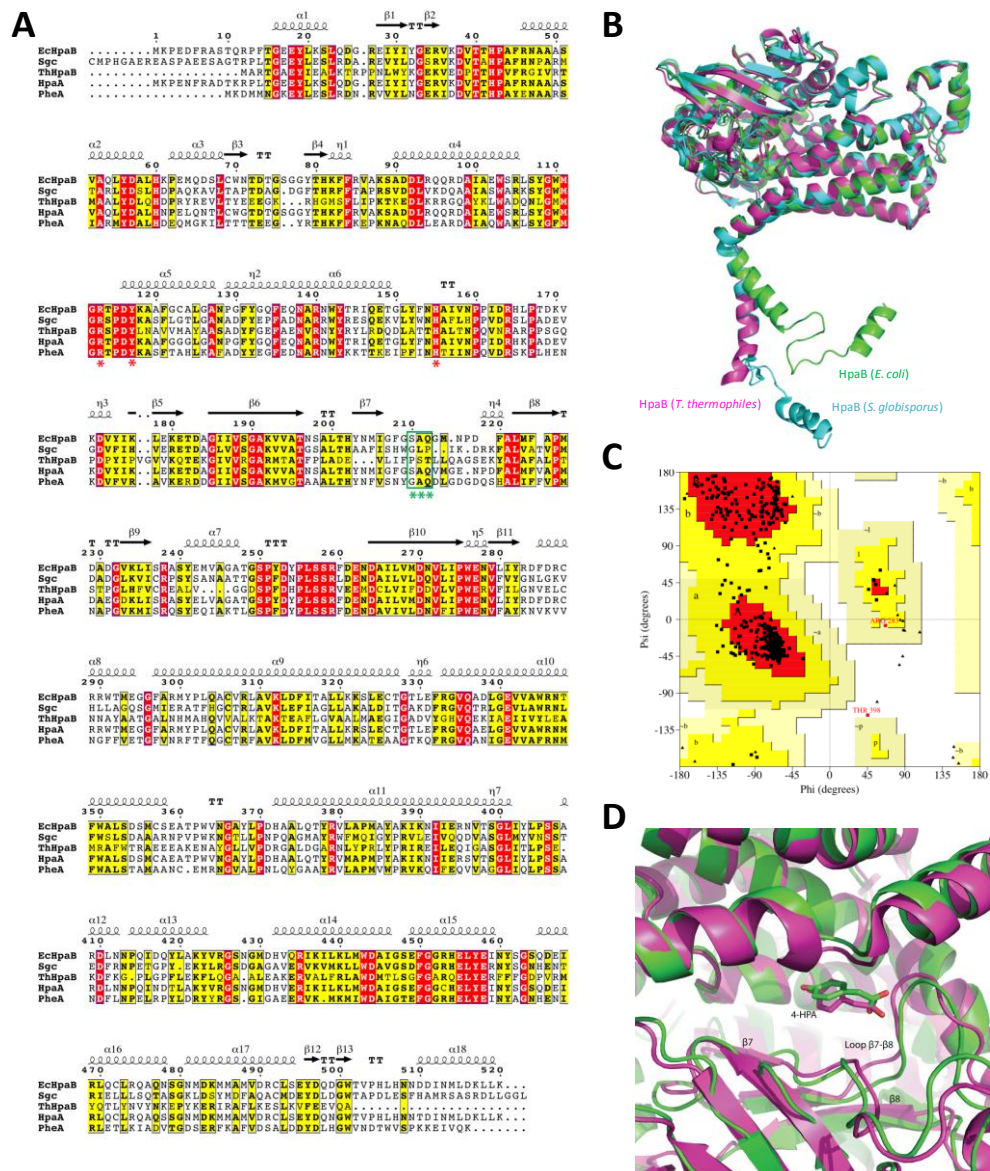

**Supplementary Figure. 2.** Modeling the structure of HpaB from *E. coli*. (A) Sequence alignment of HpaB from different species. Highly conserved residues were highlighted with red color, the catalytic residues R113, Y117 and H155 were marked with red markers. The residues involved substrate bindings were highlighted with green markers. (B) Alignment of *E. coli* HpaB model with HpaB structures from *Streptomyces globisporus* and *Thermus thermophilus*. The resulted RMSD were 0.605 and 1.048, for 4OO2<sup>3</sup> and 2YYJ<sup>4</sup>, respectively. (C) The Ramachandran plot for HpaB model. (D) The substrate binding pocket comparison.

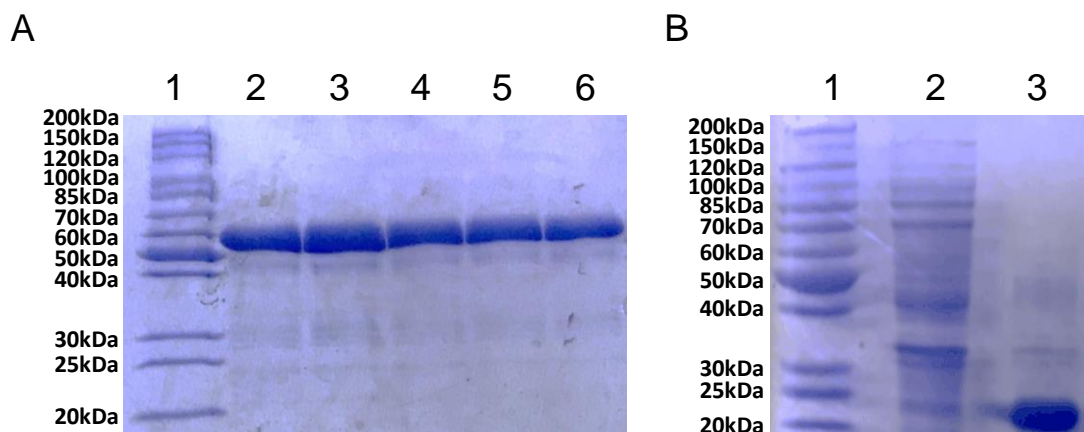

**Supplementary Figure. 3.** Protein expression and purification assessed with SDS-PAGE. (A) Purification of wild-type and mutant HpaBs. Lane 2 and 3 show all purified wild-type HpaB; Lane 4, 5 and 6 show purified HpaB mutant A10, D11 and H7, respectively. (B) Purification of HpaC. Lane 2 shows the cell lysate of strain BL21(DE3) harboring plasmid pET28a; Lane 3 shows purified HpaC. Source data are provided in the Excel format Source Data file.

**Table 1 Plasmids used in this study.**

| Plasmids                          | Description                                                                                         | Reference or source |
|-----------------------------------|-----------------------------------------------------------------------------------------------------|---------------------|
| Strains                           |                                                                                                     |                     |
| MC1061                            | For gene cloning                                                                                    | 5                   |
| BL21(DE3)                         | For protein purification                                                                            | Novagen             |
| BW25113                           | For hydroxytyrosol biosynthesis                                                                     | 6                   |
| JW1380-KC                         | Strain from Keio collection in which <i>feaB</i> gene was replaced with FRT-flanked <i>kan</i> gene | 7                   |
| BHYT                              | Strain BW25113 with <i>feaB</i> gene knocked out                                                    | This study          |
| Plasmids                          |                                                                                                     |                     |
| pBAD18-Kan                        | Plasmid with pBR322 replication origin                                                              | 8                   |
| pFA                               | Plasmid with p15A replication origin                                                                | This study          |
| pRSF                              | Plasmid with pRSF3010 replication origin                                                            | This study          |
| pFA- <i>hpaBC</i>                 | HpaBC expressed from plasmid pFA                                                                    | This study          |
| pFA- <i>tyo-tdc-hpaBC</i> (P1)    | Pathway constructed in pFA                                                                          | This study          |
| pBAD18- <i>tyo-tdc-hpaBC</i> (P2) | Pathway constructed in pBAD18-Kan                                                                   | This study          |
| pRSF- <i>tyo-tdc-hpaBC</i> (P3)   | Pathway constructed in pRSF                                                                         | This study          |
| pRSF- <i>tdc-tyo-hpaBC</i> (P4)   | Pathway constructed in pRSF                                                                         | This study          |
| pRSF- <i>tyo-hpaBC-tdc</i> (P5)   | Pathway constructed in pRSF                                                                         | This study          |
| pRSF- <i>hpaBC-tyo-tdc</i> (P6)   | Pathway constructed in pRSF                                                                         | This study          |
| pRSF- <i>hpaBC-tdc-tyo</i> (P7)   | Pathway constructed in pRSF                                                                         | This study          |
| pET28a                            | pET expression vector                                                                               | Novagen             |
| pET28a- <i>hpaB</i>               | HpaB expressed from pET28a vector                                                                   | This study          |
| pET28a- <i>hpaC</i>               | HpaC expressed from pET28a vector                                                                   | This study          |

**Table 2 Primers used in this study.**

| <b>Primers</b>                 | <b>Sequence (5'-3')</b>                  |
|--------------------------------|------------------------------------------|
| pFA-for- <i>XhoI</i>           | AAACTCGAGGATCTGGTACTAGTGGTGAATT          |
| pFA-rev- <i>NdeI</i>           | GGAATTCATATGGGTTAATTCCTCCTGTTAGC         |
| P1-gibson-1(for vector)        | AAATGGAAGCTGCGATTTAAGATCTGGTACTAGTGGTGAA |
| P1-gibson-2(for vector)        | ACCACATGCGGGTTGCTCATGGTTAATTCCTCCTGTTAGC |
| P1-gibson-3(for <i>tyo</i> )   | GCTAACAGGAGGAATTAACCATGAGCAACCCGCATGTGGT |
| P1-gibson-4(for <i>tyo</i> )   | TCATATTGTTTCTCCTTTACGCACGAATATCACGCA     |
| P1-gibson-5(for <i>tdc</i> )   | GTAAGGAGAAACAATATGAAAAACGAAAAATTAGC      |
| P1-gibson-6(for <i>tdc</i> )   | TCATATTGTTTCTCCTTTATTTTACGTCGTAAATTT     |
| P1-gibson-7(for <i>hpaBC</i> ) | ATAAAGGAGAAACAATATGAAACCAGAAGATTTCCG     |
| P1-gibson-8(for <i>hpaBC</i> ) | TTCACCACTAGTACCAGATCTTAAATCGCAGCTTCCATTT |
| P2-gibson-1(for vector)        | AAATGGAAGCTGCGATTTAAGATCTGGTACTAGTGGTGAA |
| P2-gibson-2(for vector)        | ACCACATGCGGGTTGCTCATGGTTAATTCCTCCTGTTAGC |
| P2-gibson-3(for <i>tyo</i> )   | GCTAACAGGAGGAATTAACCATGAGCAACCCGCATGTGGT |
| P2-gibson-4(for <i>tyo</i> )   | TCATATTGTTTCTCCTTTACGCACGAATATCACGCA     |
| P2-gibson-5(for <i>tdc</i> )   | GTAAGGAGAAACAATATGAAAAACGAAAAATTAGC      |
| P2-gibson-6(for <i>tdc</i> )   | TCATATTGTTTCTCCTTTATTTTACGTCGTAAATTT     |
| P2-gibson-7(for <i>hpaBC</i> ) | ATAAAGGAGAAACAATATGAAACCAGAAGATTTCCG     |
| P2-gibson-8(for <i>hpaBC</i> ) | TTCACCACTAGTACCAGATCTTAAATCGCAGCTTCCATTT |
| P3-gibson-1(for vector)        | AAATGGAAGCTGCGATTTAAGATCTGGTACTAGTGGTGAA |
| P3-gibson-2(for vector)        | ACCACATGCGGGTTGCTCATGGTTAATTCCTCCTGTTAGC |
| P3-gibson-3(for <i>tyo</i> )   | GCTAACAGGAGGAATTAACCATGAGCAACCCGCATGTGGT |
| P3-gibson-4(for <i>tyo</i> )   | TCATATTGTTTCTCCTTTACGCACGAATATCACGCA     |
| P3-gibson-5(for <i>tdc</i> )   | GTAAGGAGAAACAATATGAAAAACGAAAAATTAGC      |
| P3-gibson-6(for <i>tdc</i> )   | TCATATTGTTTCTCCTTTATTTTACGTCGTAAATTT     |
| P3-gibson-7(for <i>hpaBC</i> ) | ATAAAGGAGAAACAATATGAAACCAGAAGATTTCCG     |
| P3-gibson-8(for <i>hpaBC</i> ) | TTCACCACTAGTACCAGATCTTAAATCGCAGCTTCCATTT |
| P4-gibson-1(for vector)        | AAATGGAAGCTGCGATTTAAGATCTGGTACTAGTGGTGAA |

|                                |                                          |
|--------------------------------|------------------------------------------|
| P4-gibson-2(for vector)        | GCTAATTTTTCGTTTTTCATGGTTAATTCCTCCTGTTAGC |
| P4-gibson-3(for <i>tdc</i> )   | GCTAACAGGAGGAATTAACCATGAAAAACGAAAAATTAGC |
| P4-gibson-4(for <i>tdc</i> )   | TCATATTGTTTCTCCTTTATTTTACGTCGTAAATTT     |
| P4-gibson-5(for <i>tyo</i> )   | ATAAAGGAGAAACAATATGAGCAACCCGCATGTGGT     |
| P4-gibson-6(for <i>tyo</i> )   | TCATATTGTTTCTCCTTTACGCACGAATATCACGCA     |
| P4-gibson-7(for <i>hpaBC</i> ) | GTAAGGAGAAACAATATGAAACCAGAAGATTTCCG      |
| P4-gibson-8(for <i>hpaBC</i> ) | TTCACCACTAGTACCAGATCTTAAATCGCAGCTTCCATTT |
| P5-gibson-1(for vector)        | TTCACCACTAGTACCAGATCTTATTTTACGTCGTAAATTT |
| P5-gibson-2(for vector)        | ACCACATGCGGGTTGCTCATGGTTAATTCCTCCTGTTAGC |
| P5-gibson-3(for <i>tyo</i> )   | GCTAACAGGAGGAATTAACCATGAGCAACCCGCATGTGGT |
| P5-gibson-4(for <i>tyo</i> )   | TCATATTGTTTCTCCTTTACGCACGAATATCACGCA     |
| P5-gibson-5(for <i>hpcBC</i> ) | TCATATTGTTTCTCCTTTACGCACGAATATCACGCA     |
| P5-gibson-6(for <i>hpcBC</i> ) | TCATATTGTTTCTCCTTTAAATCGCAGCTTCCATTT     |
| P5-gibson-7(for <i>tdc</i> )   | TTAAAGGAGAAACAATATGAAAAACGAAAAATTAGC     |
| P5-gibson-8(for <i>tdc</i> )   | AAATTTACGACGTAAAATAAGATCTGGTACTAGTGGTGAA |
| P6-gibson-1(for vector)        | AAATTTACGACGTAAAATAAGATCTGGTACTAGTGGTGAA |
| P6-gibson-2(for vector)        | CGGAAATCTTCTGGTTTCATGGTTAATTCCTCCTGTTAGC |
| P6-gibson-3(for <i>hpcBC</i> ) | GCTAACAGGAGGAATTAACCATGAAACCAGAAGATTTCCG |
| P6-gibson-4(for <i>hpcBC</i> ) | TCATATTGTTTCTCCTTTAAATCGCAGCTTCCATTT     |
| P6-gibson-5(for <i>tyo</i> )   | TTAAAGGAGAAACAATATGAGCAACCCGCATGTGGT     |
| P6-gibson-6(for <i>tyo</i> )   | TCATATTGTTTCTCCTTTACGCACGAATATCACGCA     |
| P6-gibson-7(for <i>tdc</i> )   | GTAAGGAGAAACAATATGAAAAACGAAAAATTAGC      |
| P6-gibson-8(for <i>tdc</i> )   | TTCACCACTAGTACCAGATCTTATTTTACGTCGTAAATTT |
| P7-gibson-1(for vector)        | TGCGTGATATTCGTGCGTAAGATCTGGTACTAGTGGTGAA |
| P7-gibson-2(for vector)        | CGGAAATCTTCTGGTTTCATGGTTAATTCCTCCTGTTAGC |
| P7-gibson-3(for <i>hpcBC</i> ) | GCTAACAGGAGGAATTAACCATGAAACCAGAAGATTTCCG |
| P7-gibson-4(for <i>hpcBC</i> ) | TCATATTGTTTCTCCTTTAAATCGCAGCTTCCATTT     |
| P7-gibson-5(for <i>tdc</i> )   | TTAAAGGAGAAACAATATGAAAAACGAAAAATTAGC     |
| P7-gibson-6(for <i>tdc</i> )   | TCATATTGTTTCTCCTTTATTTTACGTCGTAAATTT     |

|                               |                                          |
|-------------------------------|------------------------------------------|
| P7-gibson-7(for <i>tyo</i> )  | ATAAAGGAGAAACAATATGAGCAACCCGCATGTGGT     |
| P7-gibson-8(for <i>tyo</i> )  | TTCACCACTAGTACCAGATCTTACGCACGAATATCACGCA |
| <i>hpaBC</i> -Saturated-fwd   | ATTGGCTTCGGCNNSNNSNNSGTGATGGGCGAA        |
| <i>hpaBC</i> -Saturated-rev   | TGACCCACGGCGTTGCTTCTGAACACATCGAGTCACTC   |
| <i>hpaB</i> -for- <i>NdeI</i> | GGAATTCCATATGAAACCAGAAGATTTCCGCG         |
| <i>hpaB</i> -rev- <i>XhoI</i> | AAACTCGAGTTATTTTCAGCAGCTTATCCAGC         |
| <i>hpaC</i> -for- <i>NdeI</i> | GGAATTCCATATGCAATTAGATGAACAACGC          |
| <i>hpaC</i> -rev- <i>XhoI</i> | AAACTCGAGTTAAATCGCAGCTTCCATTT            |

---



**Table 3 Sequence of the *tyo* gene after codon optimization.**

| Gene       | DNA sequence after codon optimization                                                                                                                                                                                                                                                                                                                                                                                                                                                                                                                                                                                                                                                                                                                                                                                                                                                                                                                                                                                                                                                                                                                                                                                                                                                                                                                                                                                                                                                                     |
|------------|-----------------------------------------------------------------------------------------------------------------------------------------------------------------------------------------------------------------------------------------------------------------------------------------------------------------------------------------------------------------------------------------------------------------------------------------------------------------------------------------------------------------------------------------------------------------------------------------------------------------------------------------------------------------------------------------------------------------------------------------------------------------------------------------------------------------------------------------------------------------------------------------------------------------------------------------------------------------------------------------------------------------------------------------------------------------------------------------------------------------------------------------------------------------------------------------------------------------------------------------------------------------------------------------------------------------------------------------------------------------------------------------------------------------------------------------------------------------------------------------------------------|
| name       |                                                                                                                                                                                                                                                                                                                                                                                                                                                                                                                                                                                                                                                                                                                                                                                                                                                                                                                                                                                                                                                                                                                                                                                                                                                                                                                                                                                                                                                                                                           |
| <i>tyo</i> | ATGAGCAACCCGCATGTGGTGATTGTGGGTGCAGGTTTTGCAGGCC<br>TGGTGGCGGCCGCGTGAAGTGCAGATGGCCGGTGTGGATGTGGAAA<br>TTGTGGAAGCGCGTGATCGTGTGGGCGGCCGTGCATGGACCGAAG<br>AACGTATGGGTTCGTCGCTGGAAGTGGGTGCAACCTGGGTGCATTG<br>GATGCAGCCGCATGTGTGGAGCGAAATTACCCGTTATGATCAGAGC<br>ATTTATCCGAGCCCGTTTTGCGATGATGCGTATTGGATTACCGGCGG<br>CCGTGTGGAACATGGTACCGAAGCAGATCTGGATGCAGCACTGGCA<br>CGTCCGATGGCGAAAATTTTTGAAGATAGCCGTGAATTTTTCCCGTA<br>TCCGTATGAACCGCTGCATGTGCTGGATGAAAGCAGCGGCAGCACC<br>CCGGAAGTGCCTGAACGTTTTTCGTGCGGCGGATCAGGGCAGCGTG<br>CTGGATTGCCTGAAAGGCGGCGATTTTACCCAGGAAGAACGTGATC<br>TGTGCGATGCGTATTGGAGCGCGCGTATATTGGCGATCCGCATCA<br>GGGCAGCCCGCTGATGGCGAAACAGTGGGCGGCGCTGAGCGATCA<br>TCGTCTGAGCCTGGTGGATGAACAGACCCTGCGTTTTAACTGACC<br>CATGGCATGCGTGGCCTGTATGAAAACATTGCGGCGGATCTGCGTT<br>GCCCGATTCTGTCTGAACACCCCGGTGACCGCAGTGGATCATCGTAG<br>CGATGGTGC AACCGTGACCCTGGGTACCGGTGAAAAAATTAGCTGC<br>GATAGCGTGATTGTGACCGTGCCGGTGGGTGCACTGCCGACCATTG<br>AATTTACCCCGGGTCTGCCGAGCGGTATGCGTACCGTGATTGATCA<br>GCGTTGGAACAGCACCGGCTGCAAAATTTGGGTGAAAGTGAAAGG<br>CCATCATAGCATTCTGGGCTATGCGCCGACCCCGCATAAAGCGGCG<br>GTGTTTCGTAGCGAATTTTTCATGGATGATGATACCACCATTTGCGTG<br>GGCTTTGGCAGCCATCATGATGCGGTGGATCTGACCGATCCGCGTG<br>ATGCGCAGGCGATTGTGGATCAGTGGCGTCCGGATCTGGAAGTGG<br>TGGATTGCACCGGTCATGATTGGGTGGCAGATCGTTGGAGCGGTCA<br>GGCATGGGCAACCCTGCGTAGCGGCCAGTTTACCAACGGCTGGCA<br>TCATTTTCGTAGCACCGATAGCCGTCTGCGTTTTGCAGGTGCAGATT<br>GGGCGCGTGGCTGGCGTGGCGTGGTGGTGGATGGTGCAATTGAAA<br>CCGGTCTGAGCACCGCGCGTGATGTGCTGCGTGATATTCTGCGTA<br>A |

### Supplementary References:

1. Lin, Y. & Yan, Y. Biotechnological production of plant-specific hydroxylated phenylpropanoids. *Biotechnol. Bioeng.* **111**, 1895-1899 (2014).
2. Prieto, M.A., Perez-Aranda, A. & Garcia, J.L. Characterization of an *Escherichia coli* aromatic hydroxylase with a broad substrate range. *J. Bacteriol.* **175**, 2162-2167 (1993).
3. Chang, C.Y., *et al.* Crystal structures of SgcE6 and SgcC, the two-component monooxygenase that catalyzes hydroxylation of a carrier protein-tethered substrate during the biosynthesis of the enediyne antitumor antibiotic C-1027 in *Streptomyces globisporus*. *Biochemistry-US* **55**, 5142-5154 (2016).
4. Kim, S.H., *et al.* Crystal structure of the oxygenase component (HpaB) of the 4-hydroxyphenylacetate 3-monooxygenase from *Thermus thermophilus* HB8. *J. Biol. Chem.* **282**, 33107-33117 (2007).
5. Casadaban, M.J. & Cohen, S.N. Analysis of gene control signals by DNA fusion and cloning in *Escherichia coli*. *J. Mol. Biol.* **138**, 179-207 (1980).
6. Datsenko, K.A. & Wanner, B.L. One-step inactivation of chromosomal genes in *Escherichia coli* K-12 using PCR products. *Proc. Natl. Acad. Sci. USA* **97**, 6640-6645 (2000).
7. Baba, T. & Mori, H. The construction of systematic in-frame, single-gene knockout mutant collection in *Escherichia coli* K-12. *Methods Mol. Biol.* **416**, 171-181 (2008).
8. Guzman, L.M., Belin, D., Carson, M.J. & Beckwith, J. Tight regulation, modulation, and high-level expression by vectors containing the arabinose P<sub>BAD</sub> promoter. *J. Bacteriol.* **177**, 4121-4130 (1995).
